# Supplementary material
Source: publisher figshare collection journal article supplement (https://tandf.figshare.com/ndownloader/files/16340483)

**Parathyroid hormone-related protein Activates HSCs during Liver Fibrosis Development by Hedgehog signaling**

Shuying He1, Jing Tang1, Na Diao1，Yan Liao1, Jie Shi 1, Xiaoping Xu1, Fang Xie1, Lan Bai1

**Supplementary Fig. S1. N-terminal PTHrP were detected in different species hepatocytes. (A)** The viability and purity of rat hepatocytes and mouse HSCs. **(B)** Western blots were used to determine the expression levels of PTHrP in hepatocytes. **(C)** AML12 and LO2 cells were transuded with a LV-NC or LV-PTHrP, and then Quantitative RT-PCR was used to determine the mRNA levels of PTHrP**.** The relative mRNA levels are expressed as fold induction over the level in the vehicle-treated group after normalization to GAPDH. Data was mean ± SD folds over the control. *p < 0.05; **p < 0.01.

**Supplementary Fig. S2.** **PTHrP(1-36) could not induce PKA activation.** (A) Immunoblotting showed that the PTHrP(1-36) do not enhanced the expression of PKA C-α and PKA RI-α/β. (B) Immunoblotting for phosphorylated CREB (Ser133) showed that PTHrP(1-36) do not promote phosphorylated CREB. The relative protein levels are normalized respectively by GAPDH and CREB. Data was mean ± SD folds over the control. *P < 0.05; **P< 0.01.

**Supplementary Fig.S1**


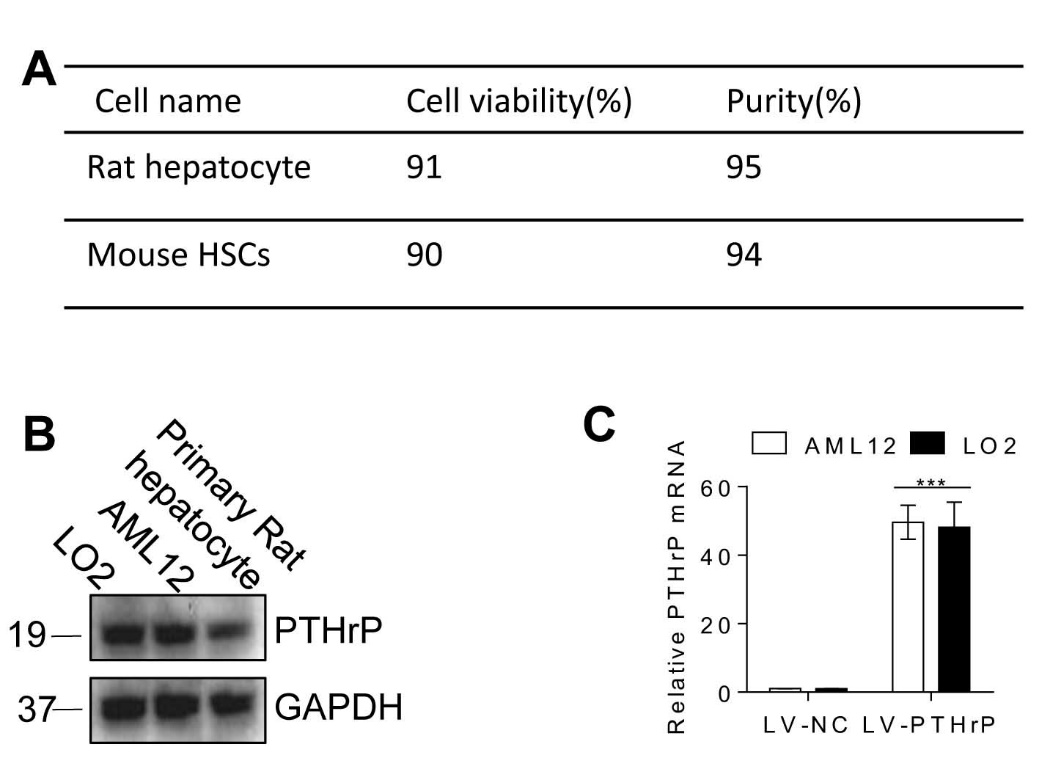


**Supplementary Fig.S2**


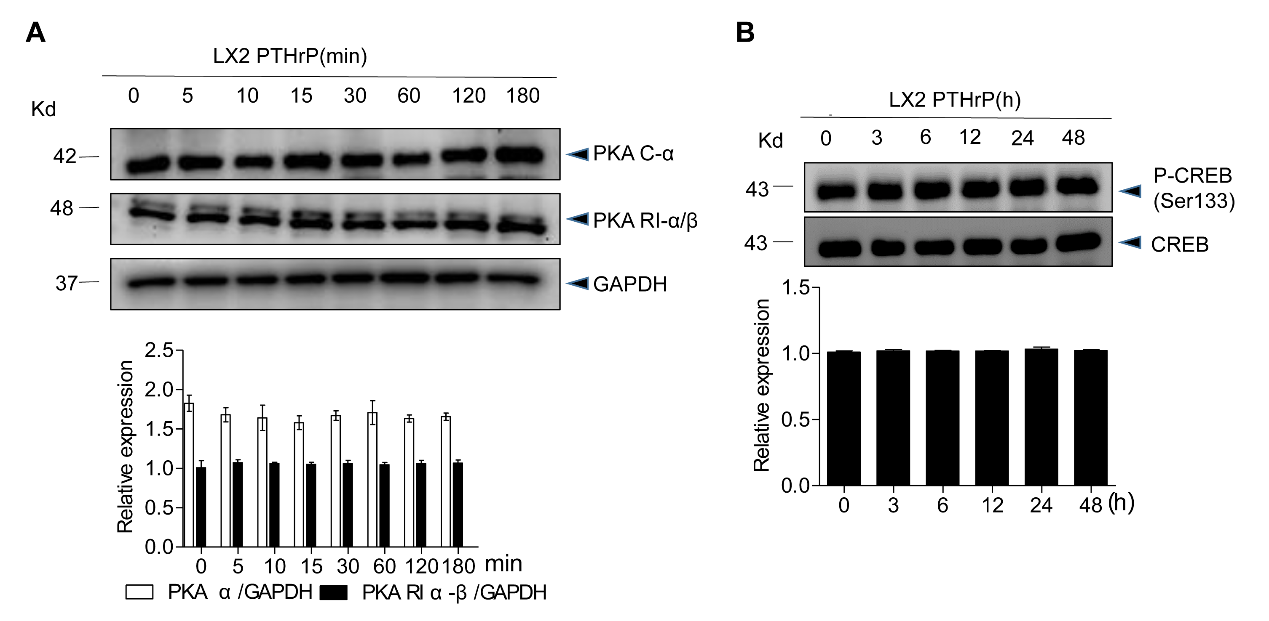

Supplement: Supplementary file 1 [file 16340483]
